# Supplementary material
Source: PubMed Central journal article supplement (PMC5567591)
Supplement: mmc1.pdf [file mmc1.pdf]

**Biophysical Journal, Volume 113**

**Supplemental Information**

**$\alpha$ -Actinin Induces a Kink in the Transmembrane Domain of  $\beta_3$ -Integrin  
and Impairs Activation via Talin**

**Hengameh Shams and Mohammad R.K. Mofrad**

Biophysical Journal, *Volume 113*

Supplemental Information

**$\alpha$ -Actinin Induces a Kink in the Transmembrane Domain of  $\beta_3$ -Integrin  
and Impairs Activation via Talin**

**H. Shams, M. R.K. Mofrad**

Molecular Cell Biomechanics Laboratory, Departments of Bioengineering and  
Mechanical Engineering, University of California, Berkeley CA 94720

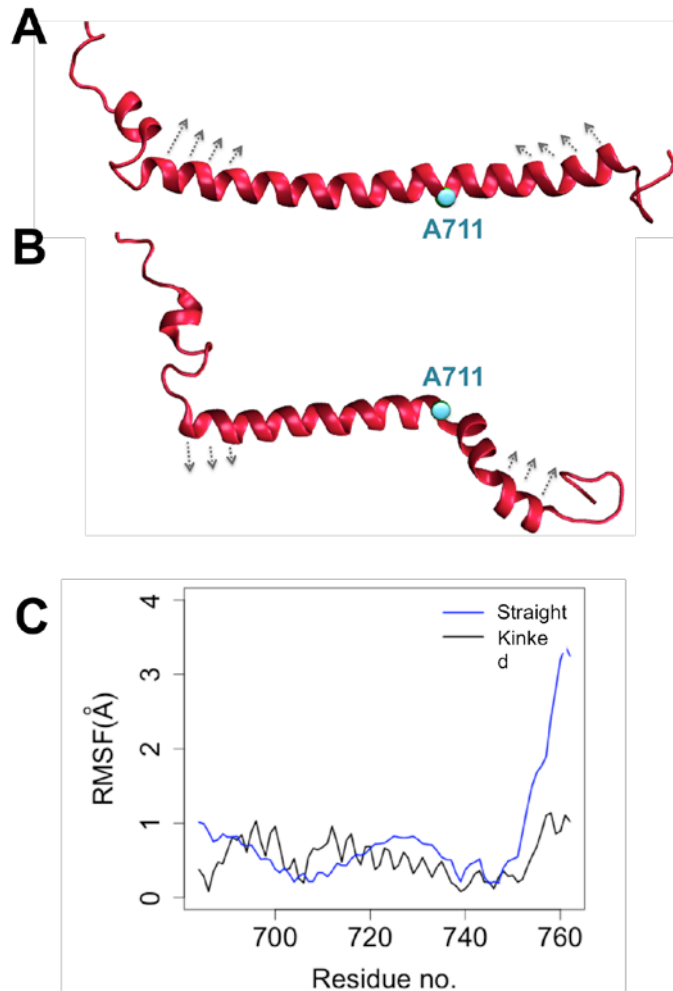

**Figure S1. The effect of the induced kink in  $\beta_3$ -TMD on mechanical modes of  $\beta_3$ .** **A)** The final configuration of the talin-bound structure of  $\beta_3$ -TMD in  $\alpha_{IIb}\beta_3$ -C simulations is straight. The NMA of straight  $\beta_3$ -TMD shows an in-phase motion of the N-TMD and C-TMD segments of  $\beta_3$ . Dashed arrows show the direction of motion in the first bending mode of the structure. **B)** Conversely, motions of the N-TMD and C-TMD regions go out of phase in the kinked structure (last frame of  $\alpha_{IIb}\beta_3$ -B) and A711 acts as a joint. **C)** The RMSF along TMD of the first bending mode of the straight conformation is smooth, while the RMSF of the kinked structure is jagged.
